# Supplementary material for: Multifunctional multi-shank neural probe for investigating and modulating long-range neural circuits in vivo
Source: PubMed Central journal article supplement (PMC6706395; doi:10.1038/s41467-019-11628-5), 2019-08-22
Supplement: 41467_2019_11628_MOESM2_ESM.pdf [file 41467_2019_11628_MOESM2_ESM.pdf]

## Description of Additional Supplementary Files

**File name:** Supplementary Code 1

**Description:** The customized Matlab code for sorting spikes from the neural signal recorded with microelectrode array of the multifunctional neural probe.
